# Supplementary material
Source: PubMed Central journal article supplement (PMC4826390)

# Supplementary Figure 1

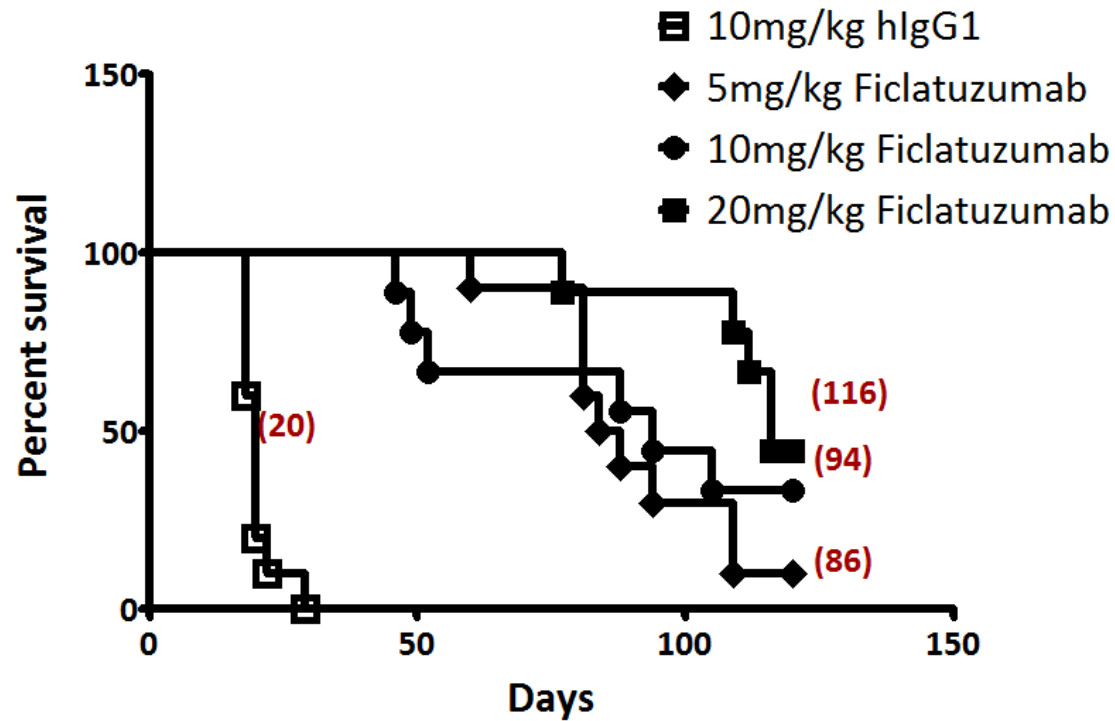

Longrank test with Bonferroni corrected threshold for P value

Control vs All groups

\*\*\*P<0.0001

5mg/kg Ficlatusumab vs 10mg/kg Ficlatusumab P = 0.5205

5mg/kg Ficlatusumab vs 20mg/kg Ficlatusumab P = 0.0137

10mg/kg Ficlatusumab vs 20mg/kg Ficlatusumab P = 0.2521

# Supplementary Figure 2

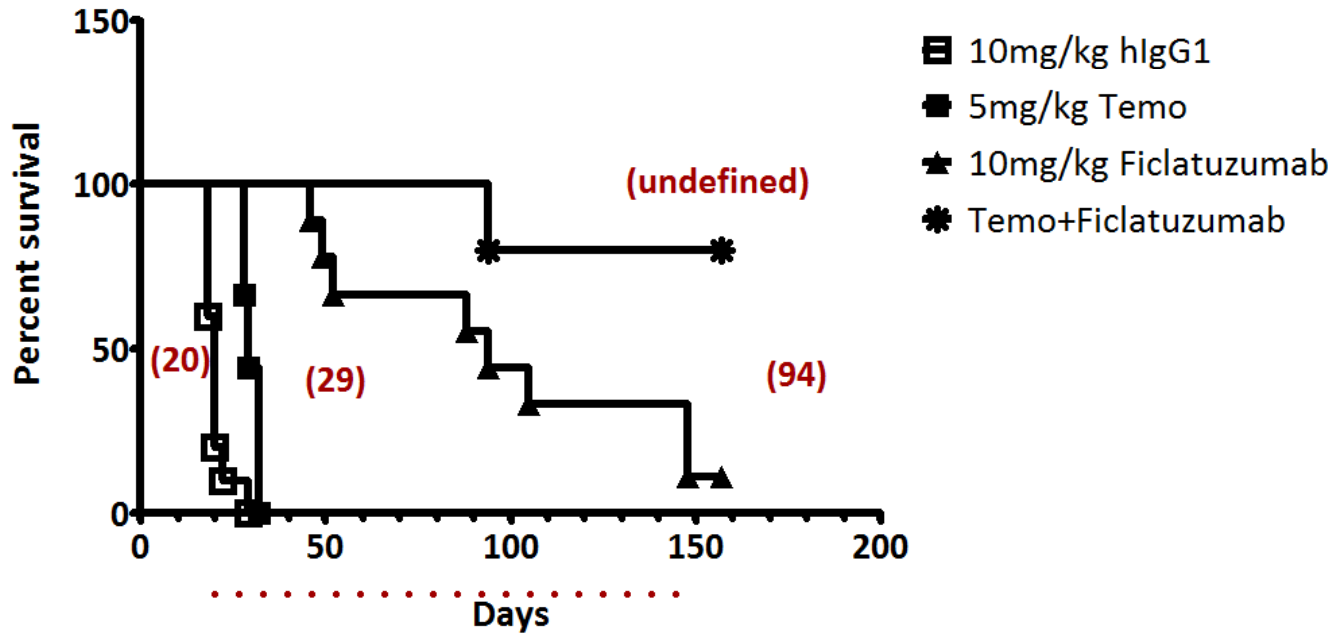

Longrank test with Bonferroni corrected threshold for P value

Control vs All groups

\*\*\*P<0.0001

Ficlatusumab alone vs Temo+Ficlatusumab

P = 0.0259

Temo alone vs Temo+Ficlatusumab

\*\*\*P<0.0001

# Supplementary Figure 3a

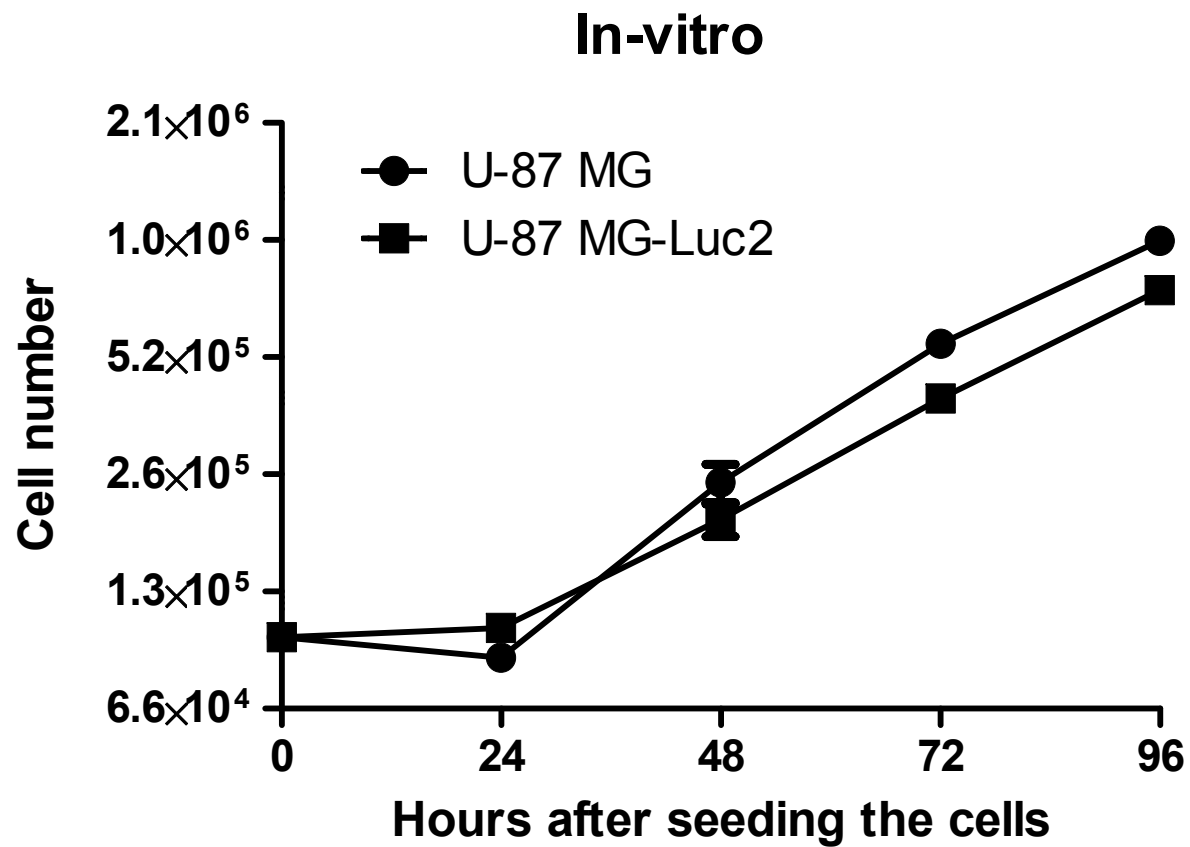

# Supplementary Figure 3b

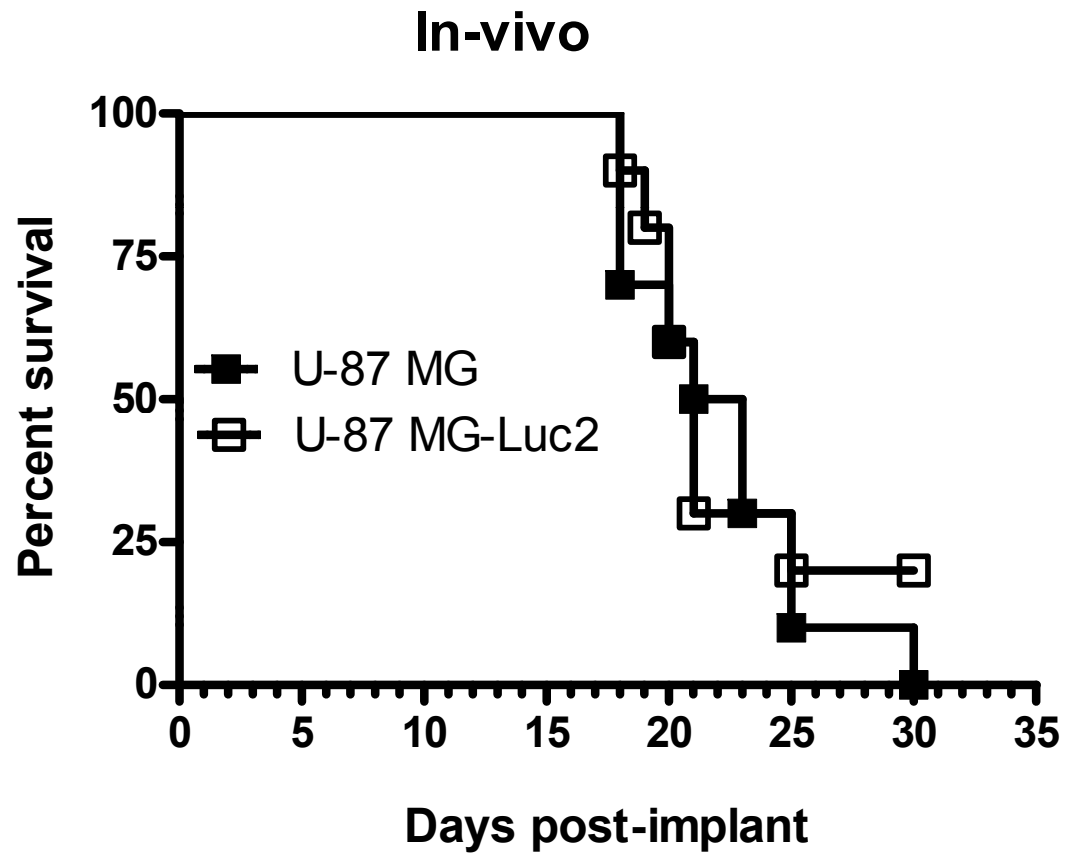

# Supplementary Figure 4

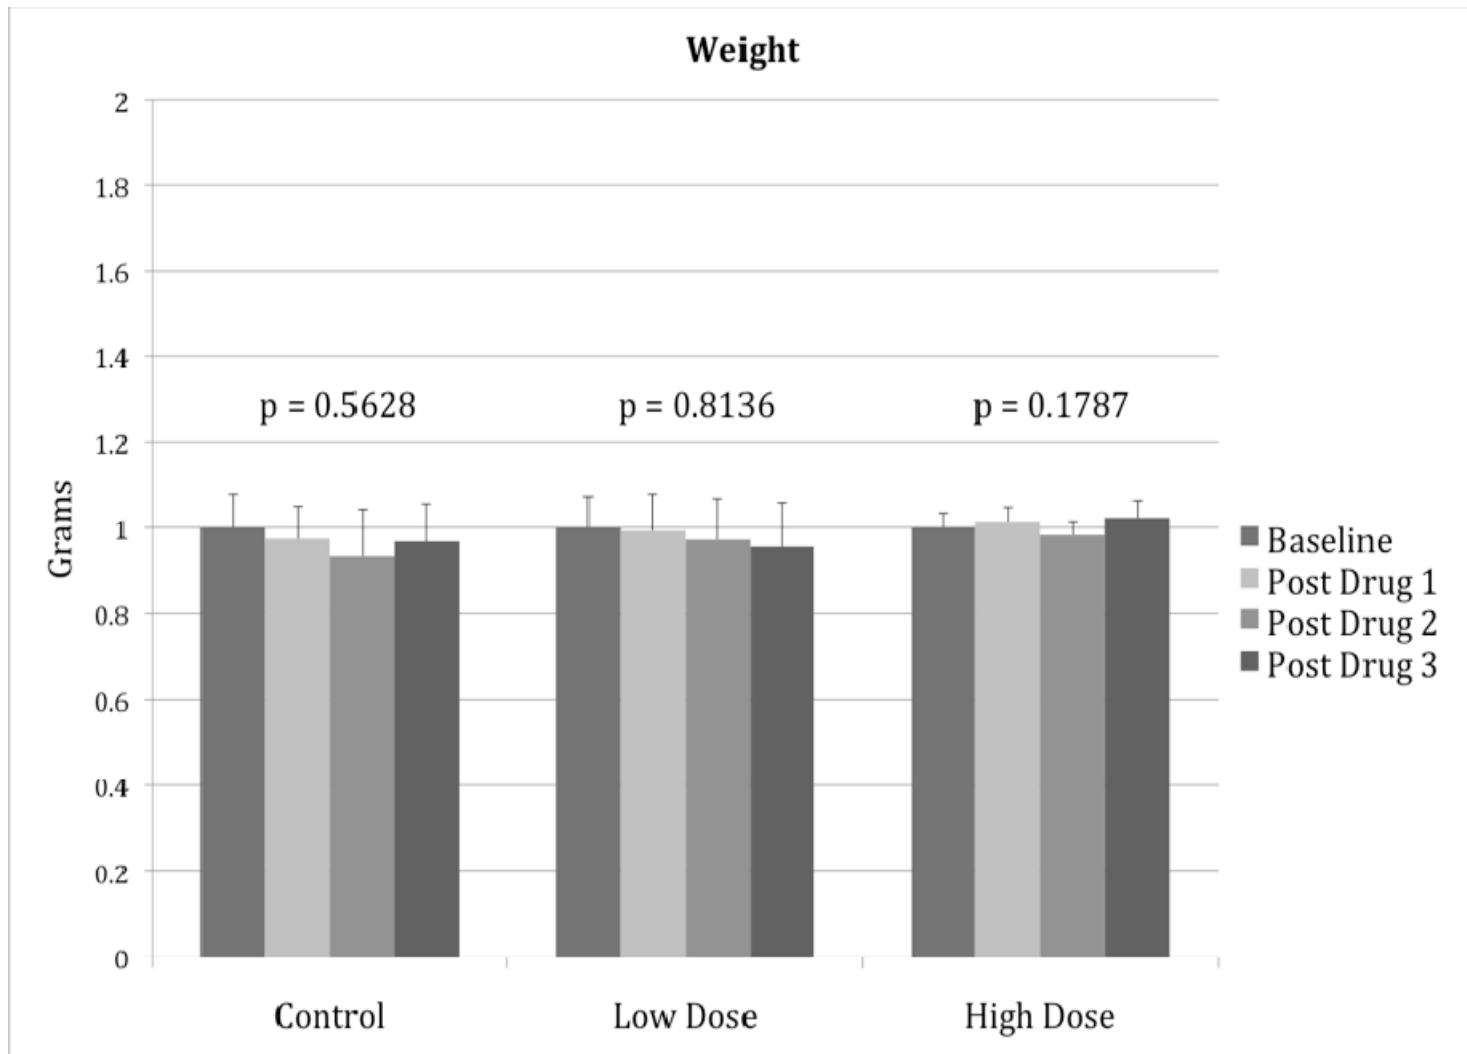

Supplement: NIHMS771015-supplement-Supplemental_Figures.pdf [file NIHMS771015-supplement-Supplemental_Figures.pdf]
