# Supplementary material
Source: PubMed Central journal article supplement (PMC4826390)
Supplement: NIHMS771015-supplement-Supplemental_Legends.pdf [file NIHMS771015-supplement-Supplemental_Legends.pdf]

**Supplementary Figure 1.** Dose titration curves of ficlatuzumab. The numbers in parenthesis are the median survival in days.

**Supplementary Figure 2.** Combination therapy of ficlatuzumab and temozolomide studied in an intracranial U87 MG xenograft mouse model. The numbers in parenthesis are the median survival in days.

**Supplementary Figure 3.** Comparison of U87 MG parental and U87 MG-Luc2 cells showing similarity in *in vitro* (a) and *in vivo* (b) characteristics.

**Supplementary Figure 4.** Change in weight (mean  $\pm$  standard deviation) over the course of the experiment in the control, low-dose, and high-dose groups. Results shown are normalized to the baseline value. The p-values shown are the results of the ANOVA for each group. In this case, there were no significant changes in weight.
