# Supplementary material
Source: PubMed Central journal article supplement (PMC4826390)
Supplement: NIHMS771015-supplement-Supplemental_Tables.pdf [file NIHMS771015-supplement-Supplemental_Tables.pdf]

## SUPPLEMENTARY TABLES

**Supplementary Table 1.** Overall results of 2<sup>nd</sup> experiment shown as percent change from baseline by experimental group: Control, Low Dose, and High Dose.

### **Control**

| <b>Average</b> | <b>Weight</b> | <b>Bioluminescence</b> | <b>PET mean</b><br>% change | <b>PET max</b> | <b>MRI</b> |
|----------------|---------------|------------------------|-----------------------------|----------------|------------|
| Post Drug 1    | 0.0           | 0.9                    |                             |                | 0.4        |
| Post Drug 2    | -0.1          | 2.2                    | 0.3                         | 0.2            | 0.9        |
| Post Drug 3    | 0.0           | 4.9                    | 1.5                         | 1.1            | 1.7        |

### **Low Dose**

| <b>Average</b> | <b>Weight</b> | <b>Bioluminescence</b> | <b>PET mean</b> | <b>PET max</b> | <b>MRI</b> |
|----------------|---------------|------------------------|-----------------|----------------|------------|
| Post Drug 1    | 0.0           | -0.3                   | -0.5            | -0.4           | 0.3        |
| Post Drug 2    | 0.0           | -0.6                   | -0.5            | -0.5           | 0.0        |
| Post Drug 3    | 0.0           | -0.5                   | -0.5            | -0.5           | -0.3       |

### **High Dose**

| <b>Average</b> | <b>Weight</b> | <b>Bioluminescence</b> | <b>PET mean</b> | <b>PET max</b> | <b>MRI</b> |
|----------------|---------------|------------------------|-----------------|----------------|------------|
| Post Drug 1    | 0.0           | -0.5                   | -0.3            | -0.2           | 0.3        |
| Post Drug 2    | 0.0           | -0.8                   | -0.3            | -0.3           | 0.3        |
| Post Drug 3    | 0.0           | -0.8                   | -0.4            | -0.3           | -0.3       |

**Supplementary Table 2.** Mitotic activity and Ki-67 labeling in the 3 animals from each group that had their brain excised for pathology. Mitotic activity was assessed, by counting mitotic figures in ten high powered (400x) fields, in each of the animals in the most proliferative areas of tumor. Ki-67 labeling was assessed semi-quantitatively.

| <b>Animal</b> | <b>Mitotic Figures Per 10 High Powered Fields</b> | <b>Ki-67 labeling index</b> |
|---------------|---------------------------------------------------|-----------------------------|
| Control1      | 48                                                | 70-80%                      |
| Control2      | 55                                                | 60-70%                      |
| Control3      | 65                                                | 70-80%                      |
| LD1           | 57                                                | 60-70%                      |
| LD2           | 50                                                | 50%                         |
| LD3           | 34                                                | 30-40%                      |
| HD1           | 10                                                | 10-20%                      |
| HD2           | 12                                                | 10-20%                      |
| HD3           | 25                                                | 20-40%                      |
